# Intensive Care Unit Resource Planning During COVID-19 Emergency at the Regional Level: the Italian case

Pietro Hiram Guzzi, Giuseppe Tradigo, Pierangelo Veltri<sup>1</sup>

<sup>1</sup>University of Catanzaro

March 17, 2020

## **Abstract**

Severe acute respiratory syndrome COVID-19 (SARS-CoV-2) has been declared a worldwide emergency and a pandemic disease by the World Health Organisation (WHO). It started in China in December 2019, and it is currently rapidly spreading throughout Italy, which is now the most affected country after China. There is great attention for the diffusion and evolution of the COVID-19 infection which started from the north (particularly in the Lombardia region) and it is now rapidly affecting other Italian regions. We investigate on the impact of patients hospitalisation in Intensive Care Units (ICUs) at

a regional and subregional granularity. We propose a model derived from well-known models in epidemic to estimate the needed number of places in intensive care units. The model will help decision-makers to plan resources in the short and medium-term in order to guarantee appropriate treatments to all patients needing it. We analyse Italian data at regional level up to March 15th aiming to: (i) support health and government decision-makers in gathering rapid and efficient decisions on increasing health structures capacities (in terms of ICU slots) and (ii) define a scalable geographic model to plan emergency and future COVID-19 patients management using reallocating them among health structures. Finally, the here proposed model can be useful in countries where COVID-19 is not yet strongly diffused.

## 1 Introduction

The coronavirus disease COVID-19 was reported in Wuhan (China) on December 2019 [10]. In one month, the surprising diffusion of this virus and a delay on the introduction of severe measures for containing it caused more than 80,981 confirmed cases and more than 3,000 deaths [13].

The COVID-19 disease is caused by the SARS-CoV-2 virus that belongs to the Coronaviridæ family. The Coronaviridæ family contains other viruses that are responsible for respiratory diseases such as the common flu and the complex MERS (middle east respiratory syndrome) and SARS (severe acute respiratory syndrome). Coronavirus family contains many viruses, while only

11 seven are known to be responsible for human diseases (229E, NL63, OC43,  
12 HKU1, MERS-CoV, SARS-CoV, and SARS-CoV-2) [9]. One of the main  
13 differences between the novel virus and the previous ones is its high spreading  
14 rate. Such a rate and the absence of tailored therapies and vaccines determine  
15 a relatively high mortality rate that has been controlled by blocking the  
16 virus spreading with severe mobility restrictions to the people of the infected  
17 regions [13].

18 At the date of March 15th, while the situation in China seems to be now  
19 under control [12], the virus is rapidly growing in other countries, such as  
20 Korea, Iran and Italy [2]. Other countries such as the USA, France, Spain  
21 and North Europe ones are implementing containment measures. The main  
22 problem is related to the exponential diffusion of infections requiring: (i)  
23 home quarantine for low symptoms, (ii) hospitalisation for part of them and,  
24 (iii) hospitalisation in ICUs requiring respiratory support for severe ones.

25 From a clinical point of view, patients affected by COVID-19 usually  
26 present symptoms similar to common flu, e.g. fever, dry cough, sickness, and  
27 breathing problems. A fraction of patients do not need hospitalisation, and  
28 the symptoms disappear in a short time (around 1-2 weeks). In some cases,  
29 COVID-19 causes severe pneumonia, which requires respiratory support and  
30 can lead to death, especially in the presence of co-morbidities such as diabetes  
31 or hypertension [3]. Patients with severe pneumonia need to be treated in  
32 ICUs with the use of mechanical ventilators [1].

33 We focus on disease diffusion modelling at a regional scale in Italy and

34 also modelling ICUs Availability throughout Italian health structures. We  
35 propose a prediction model at a regional scale that can be adapted and also  
36 used at different scales (i.e., countries, regions or even single district) by  
37 countries where COVID-19 diffusion is still growing.

## 38 **2 Data analysis and model**

39 We start from the analysis of epidemiological data from Wuhan city (China,  
40 Hubei region). As reported in [6, 5] about a third of infected patients became  
41 critically ill requiring intensive care unit admission. The lesson learned in  
42 China has been used in other countries such as Singapore for preparing a  
43 correct strategy for managing people. As noted in [8], preparing ICUs for  
44 COVID-19 patients has special requirements such as controlling infection  
45 diffusion from patient to medical staff and among patients avoiding the use  
46 of ICUs occupied by other patients. Moreover, the evolving scenario related  
47 to COVID-19 has required more frequent communication among clinicians.

48 In Italy<sup>1</sup> on March 15, we report 24,747 total cases, 20,603 people cur-  
49 rently affected, 1,809 deaths and 2,335 recovered patients. Regarding in-  
50 fected people: 9,268 are treated in their homes since they do not have severe  
51 ill, 9,663 patients have been hospitalised, and 1,672 patients have been ad-  
52 mitted to ICUs.

53 To react to the exponential growth of infected patients requiring hospital-

---

<sup>1</sup><http://www.salute.gov.it/portale/nuovocoronavirus/dettaglioContenutiNuovoCoronavirus.jsp>

54 isation, the Chinese government decided to build a large emergency hospital  
55 dedicated to COVID-19 patients in a few days. In Italy, the plan is to  
56 improve existing structures by extending the number of ICU resources and  
57 beds, as well as using dedicated health structures. E.g., the study reported  
58 in [11] focuses on accelerating the process of acquiring and furnish hospitals  
59 with assisted breathing devices. Italy has approximately 5,200 beds in ICUs,  
60 which, by law, are designed to be occupied by patients for the 80% at any  
61 given time. Also, these are allocated at a regional level proportionally to its  
62 population and are usually managed locally (see Table 1).

| Region                | Beds | Region       | Beds        |
|-----------------------|------|--------------|-------------|
| Piemonte              | 320  | Marche       | 108         |
| ValleD'Aosta          | 15   | Lazio        | 590         |
| Lombardia             | 1067 | Abruzzo      | 73          |
| P.A. Bolzano          | 48   | Molise       | 30          |
| P.A. Trento           | 23   | Campania     | 350         |
| Veneto                | 498  | Puglia       | 210         |
| Friuli Venezia Giulia | 80   | Basilicata   | 49          |
| Liguria               | 70   | Calabria     | 110         |
| Emilia Romagna        | 539  | Sicilia      | 346         |
| Toscana               | 450  | Sardegna     | 150         |
| Umbria                | 30   | <b>Italy</b> | <b>5156</b> |

Table 1: Distribution of ICU beds in each region. Such data could increase in the future due to government investments for the emergency.

63 Many of such ICU slots are yet occupied by non-COVID-19 patients while  
64 as of March 15 1,672 beds are occupied by COVID-19 patients. Considering  
65 the data progression [4], it is reasonable to predict that the number of ICUs  
66 patients will increase. Considering that the average survival time for non-  
67 survivor patients is around ten days, there is the need to make decisions  
68 about ICU resources. Such decision may regard, for instance, the institution  
69 of new ICU beds, the movement of people from one region to another (to

70 improve the overall dislocation of patients by grouping COVID-19 people in  
71 a single place). It is trivial that such decision must be based on the correct  
72 estimation of ICUs patient, but this estimation is still a matter of discussion  
73 [11].

## 74 **2.1 Diffusion Model of SARS-CoV-2**

75 We focus on decision strategy to increase number and structures able to  
76 treat COVID-19 patients in intensive units, and thus increasing the num-  
77 ber of ICUs. We propose a model able to manage in geographic scale the  
78 incoming patients and the ICUs available places. We cover the a need for  
79 the development of a predictive model for helping healthcare administra-  
80 tors in managing structure requirements to improve hospitals and patients  
81 managements. We extend a compartmental model for epidemiology, and we  
82 derive from Italian public data the experimental parameters for simulating  
83 the model. Literature contains many mathematical epidemiological models  
84 for studying the dynamics of infectious diseases [7]. These models fall in two  
85 main classes: deterministic models that are based on differential equations  
86 and stochastic models that are based on Markov processes. We here use a  
87 discrete-time Markov chain model [14] and we derive the parameters of the  
88 model starting from public available data. We use as reference a compart-  
89 mental model which we adapt from the literature (see Figure 2.1).

90 In figure 2.1 the COVID-19 diffusion is reported both for Italy and China  
91 (red zones) at current status. We note that: (i) we can make the hypothesis of

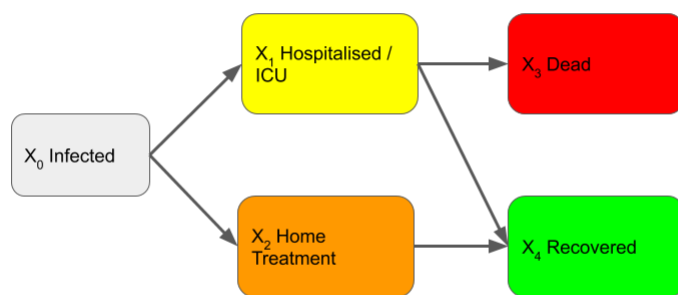

Figure 1: The Compartmental Model. Our model start by considering infected people ( $X_0$ ). A fraction of infected people presents severe symptoms and they need to be hospitalised and treated in ICUs ( $X_1$ ). Diversely, some people may be treated at home ( $X_2$ ) since they do not have severe complications. Treated people has a lethal outcome ( $X_3$ ) while a hopefully large fraction of people is recovered from disease.

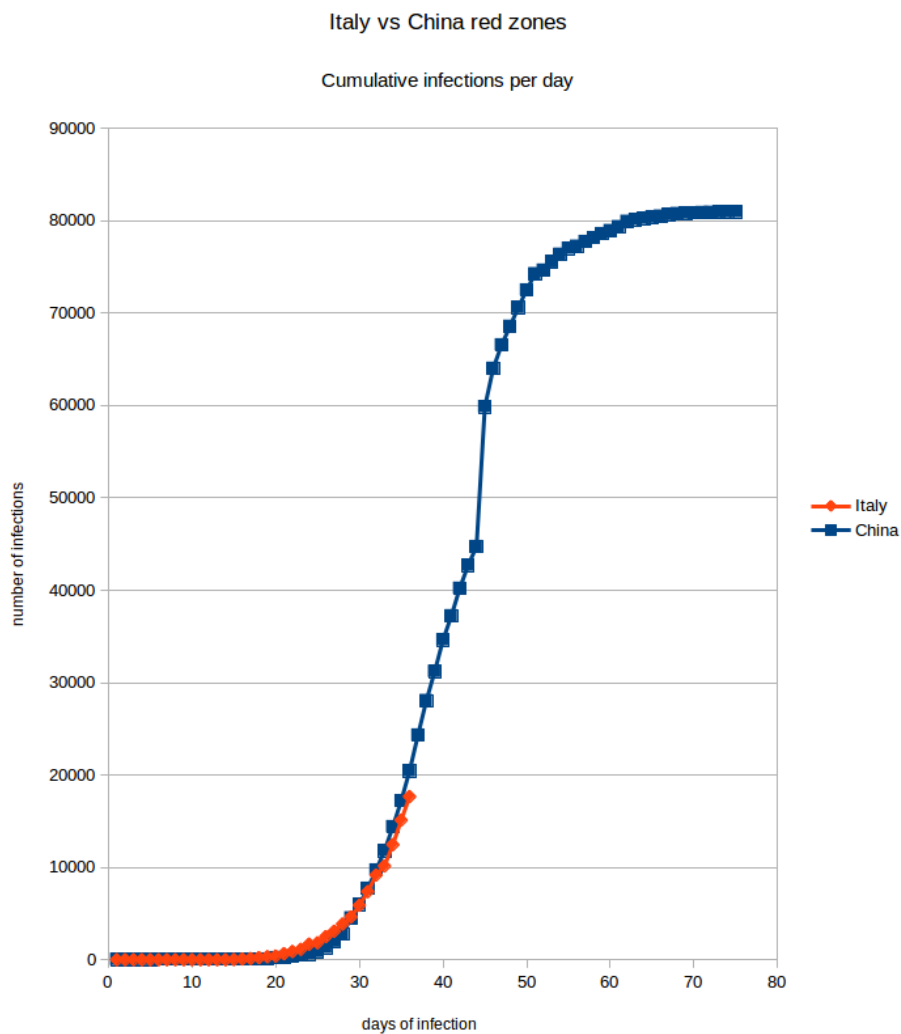

Figure 2: Here the two Italian and Chinese red zones (areas of maximal infection) are compared. On the X axis there are days and on the Y axis there are the total number of cases. The two curves are very similar showing that the initial trend of the infection follows an exponential growth, even though the Chinese government rapidly adopted stringent confinement measures. We can thus expect to observe the same initial infection evolution, before arriving to the logistic portion of the curve.



92 similar trend for different countries (including Italy) and that in the logistic  
93 phase diseases should be treated even if not in emergency to manage the  
94 fraction of patients that require ICUs.

### 95 **3 Regional Scale Geographic distribution**

96 The Italian National Health Service is organised on a national and regional  
97 scale. The central government controls the distribution of resources and  
98 services are arranged at a regional scale. There are 19 regions and two  
99 autonomous provinces (21 total administrative units). Therefore the ICUs is  
100 availability is organised at a regional scale, established by each region. Table  
101 1 summarise current ICU beds availability per administrative units. Patients  
102 are admitted into the ICUs of its region, without considering other criteria,  
103 such as free beds into ICUs of other regions that may be geographically closer.  
104 The access is freely guaranteed costs are mapped to citizen with respect to  
105 their regions of residence.

106 This may cause the undesired case that some regions may have many  
107 available beds, and other regions do not. This is what is happening in north  
108 Italy where restriction plans to reduce citizen mobility has been applied at  
109 the regional scale. Figure 3 shows the distribution of total ICU beds versus  
110 occupied ICU beds (i.e. in hospitals) for each region in Italy. Figure 3 shows  
111 the infected cases for each region.

112 We compare through our model the management of beds in single regions

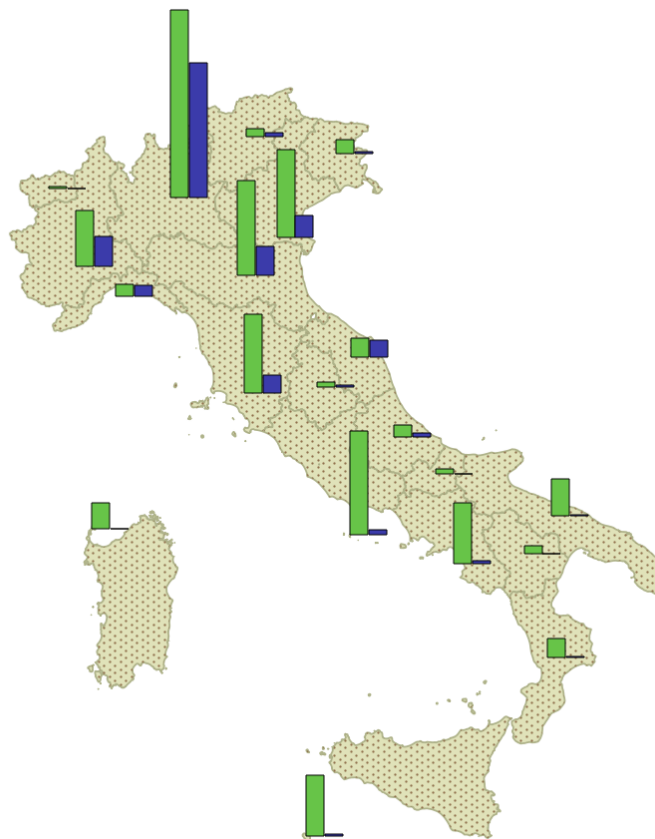

Figure 3: Figure depicts the total number of ICU beds and the number of currently occupied per region. Data is available online on the Italian Civil Protection Department website at <https://github.com/pcm-dpc/COVID-19/blob/master/dati-regioni/dpc-covid19-ita-regioni-20200315.csv> with licence CC-BY-4.0.

113 as compartment and the management of places on a nationwide scale (ad-  
114 mitting transfers among regions). Our findings suggest that the management  
115 of ICUs beds as a whole across regions may improve the overall availability  
116 of free beds for COVID-19 patients.

117 Figure 3 shows the distribution of total ICU beds versus occupied ICU

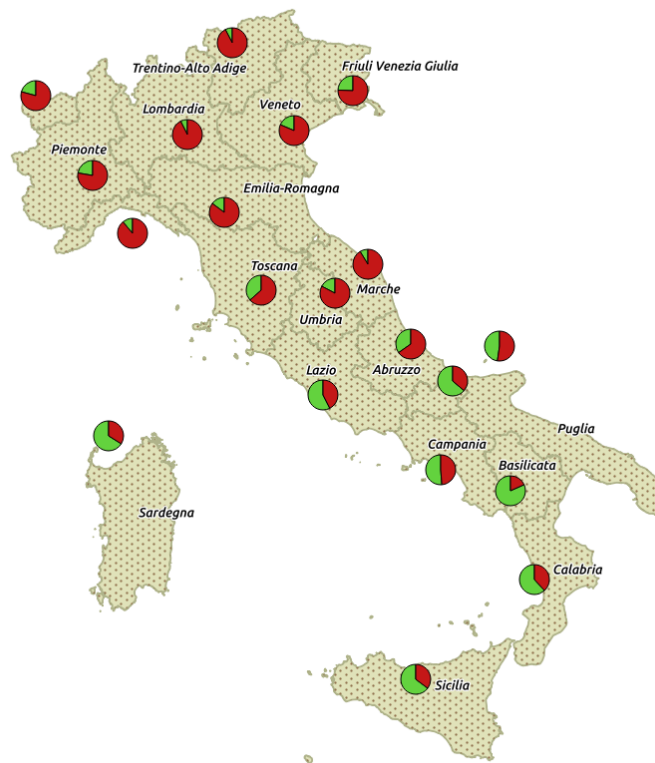

Figure 4: Figure depicts the distribution of COVID-19 infected cases along Italian peninsula. Data is available online on the Italian Civil Protection Department website at <https://github.com/pcm-dpc/COVID-19/blob/master/dati-regioni/dpc-covid19-ita-regioni-20200315.csv> with licence CC-BY-4.0.

118 beds (i.e. in hospitals) for each region in Italy. Figure 3 shows the infected  
119 cases for each region.

## 120 4 Model based ICUs Prediction

121 We want to relate the number of ICU beds with infectious cases. In particu-  
122 lar, the target is to predict the number of ICUs bed necessary and required  
123 for the amount of infections in a region.

124 Starting from the representation of infectious diseases trend, we map  
125 trend for each Italian region. Then we map and elaborate trend of ICUs bed  
126 requirements for infections in each region. This is used to relate infections  
127 and ICUs beds (see Figure 4 for Lombardia region). Predicting the number  
128 of diseases by using the exponential equation of Figure 4, we may guess the  
129 number of infectious in single regions in a short time and thus using such a  
130 number to predict the number of ICUs required. These predictions may be  
131 used to plan necessity in a short time and also eventually map ICUs non-  
132 COVID-19 patients in different regions by reallocating patients in different  
133 related structures (hospitals).

134 Similarly, for currently most COVID-19 interested Italian regions, trends  
135 are reported in Figures 4, 4 for Veneto region, and Figure 4 and 4 for Emilia  
136 Romagna region. Lombardia, Veneto and Emilia Romagna are the top three  
137 regions with an emergency in terms of ICU beds necessity at the date of  
138 March 15th (*saturated regions*). These regions are already starting the re-  
139 allocation plans for ICU patients in different regions as well as emergency  
140 plans to free ICU beds.

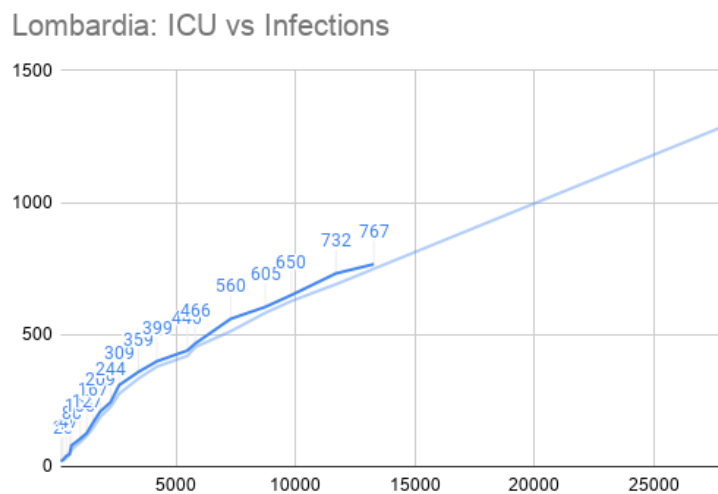

Figure 5: Regional Diffusion of Infections in the Lombardia at the date of March 15th.

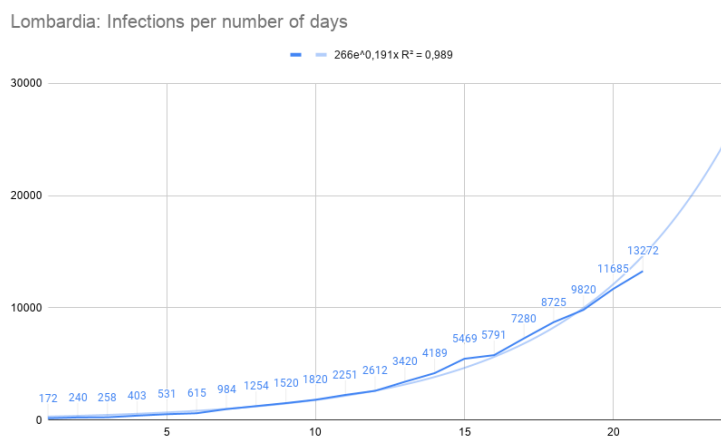

Figure 6: ICU beds prediction graph for the Lombardia region.

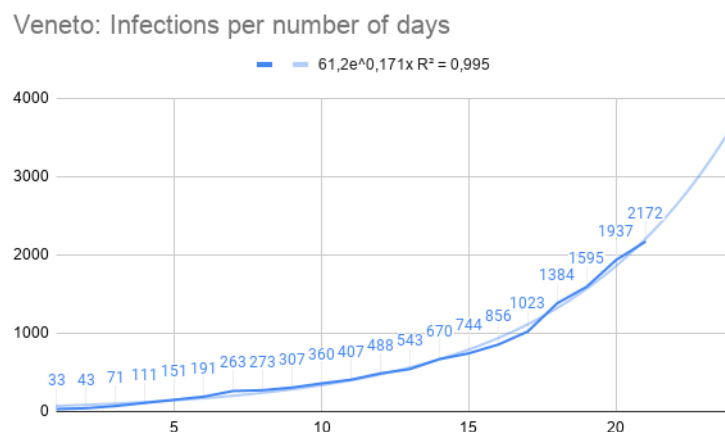

Figure 7: Regional Diffusion of Infections in the Veneto region at the date of March, 15th.

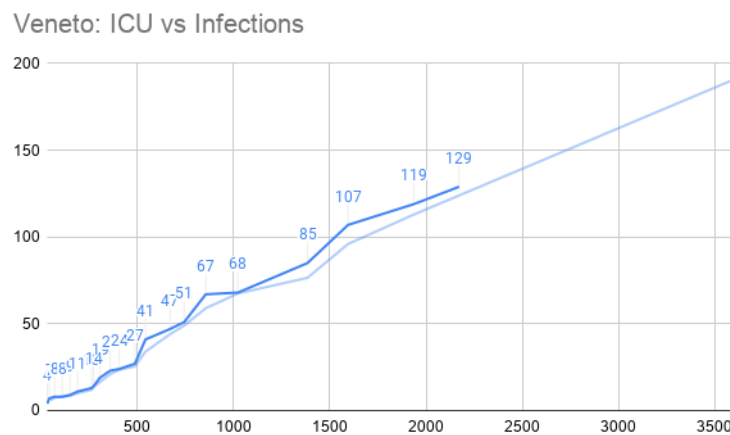

Figure 8: Regional Diffusion of Infections vs ICU beds in Veneto Region at the date of March, 15th.

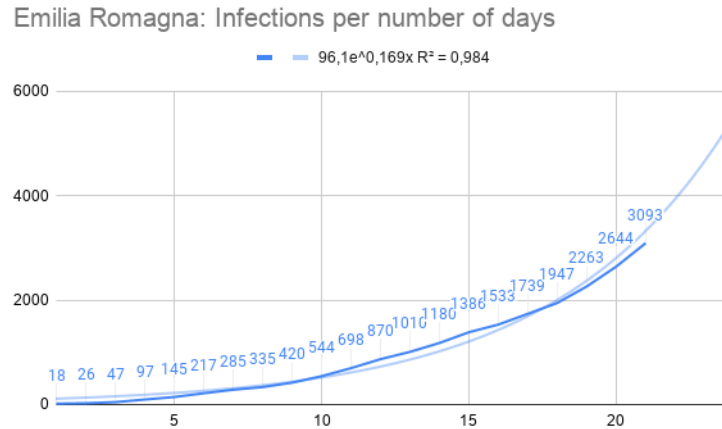

Figure 9: Regional Diffusion of Infections in Emilia Romagna Region at the date of March, 15th.

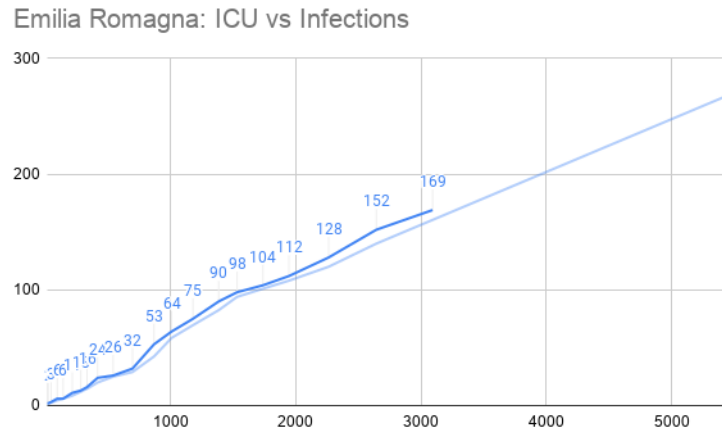

Figure 10: Regional Diffusion of Infections vs ICU beds in Emilia-Romagna Region at the date of March, 15th.

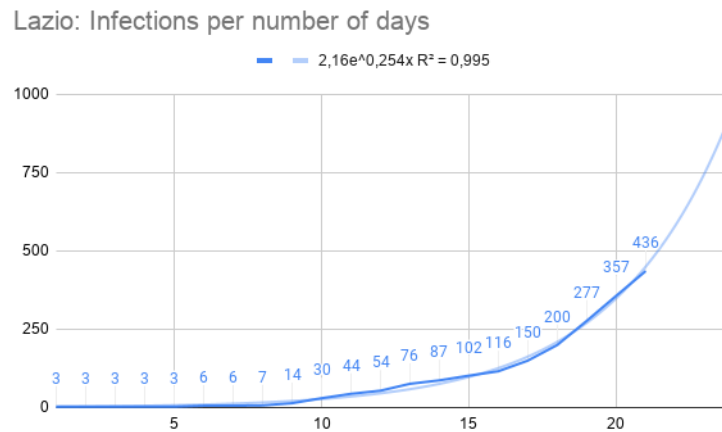

Figure 11: Regional Diffusion of Infections in Lazio Region (Central part of Italy) at the date of March 15th.

141 **Predicting ICU for non-saturated regions** Italian regions in the centre  
142 and south of Italy, are still living an increasing phase of infection disease  
143 with respect to ICU beds capacity (i.e. *non saturated regions*, see Figure 3).  
144 We propose to use the predicting model for these regions to early predict  
145 saturation phases. In Figures 4 and 4 a diffusion of disease and relative  
146 connections with ICUs requirements are reported and refer to a central Italian  
147 region, i.e. Lazio, whose capital is Rome. By using both a decisor can  
148 calculate the number of infection for some time point in the future and derive  
149 the number of predicted ICU beds which will be occupied. Similarly, in  
150 Figure 4 we report Campania region situation at March 15th as south of Italy  
151 representation. In such case note that the government restrictions rapidly  
152 adopted allow a slower diffusion of infectious.

153 Note that in a similar way we map all data for all the 21 Italian regions.



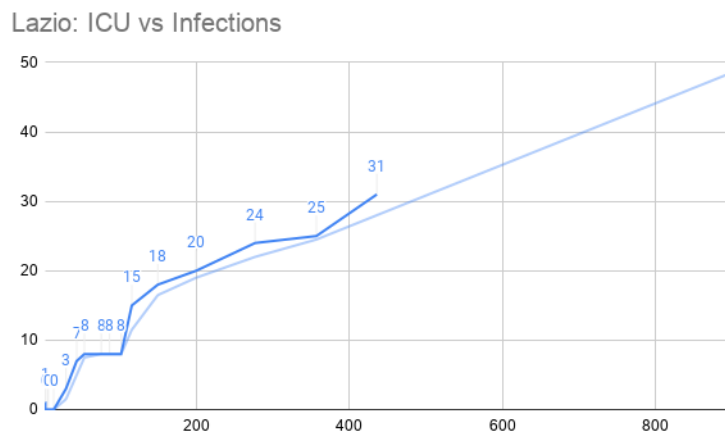

Figure 12: Regional Diffusion of Infections in Lazio Region versus used ICUs at the date of March 15th.

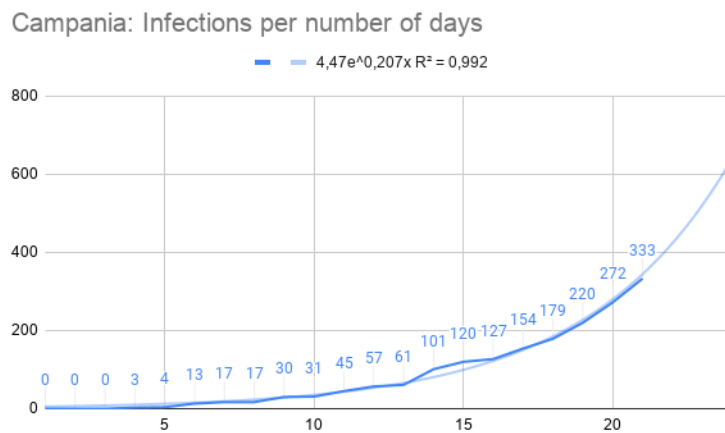

Figure 13: Regional Diffusion of Infections in Campania Region as south italian representative one at the date of March 15th.

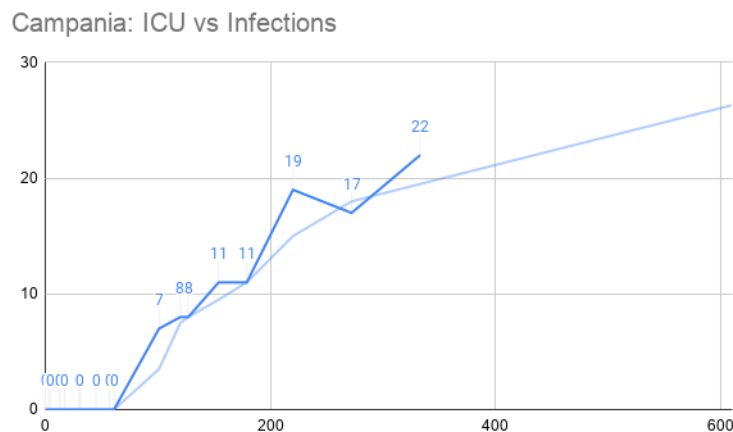

Figure 14: Regional Diffusion of Infections vs number of ICUs used places in Campania Region as south italian representative one at the date of March 15th.

## 154 5 Conclusion

155 The emergency of COVID-19 is related to an aggressive virus that diffuses  
156 rapidly and strongly stresses the resistance of health structures. We also  
157 think that patients management is strictly related to the availability of hos-  
158 pital structure to manage such kind of diseases that require different and  
159 non-standard protocols as use of respiratory devices. We think that by using  
160 a scalable predictive model at regional as well as at district granularity may  
161 support regional and national government in managing the emergency. We  
162 finally claim that such a model can be used in countries where diffusion is  
163 still at the beginning as in the US, French, Spain and other European coun-  
164 tries as reported in <sup>2</sup> where different virus diffusion trajectories are reported

<sup>2</sup><https://www.ft.com/content/ff3affea-63c7-11ea-b3f3-fe4680ea68b5>

165 for different countries.

## 166 **6 Contributors**

167 GT was responsible for data analysis and statistics, and writing of the manuscript.

168 PHG was responsible for data analysis and writing of the manuscript. PV

169 was responsible for data analysis and writing of the manuscript.

## 170 **7 Declarations of interest**

171 We declare no competing interests.

## 172 **8 Acknowledgments**

173 We thank Italian Protezione Civile for freely providing online data thus allow-

174 ing studies on COVID-19 . We thank Prof. Tamer Kahveci from University

175 of Florida for useful suggestions.

## 176 **References**

177 [1] Yaseen M Arabi, Robert Fowler, and Frederick G Hayden. Critical care

178 management of adults with community-acquired severe respiratory viral

179 infection. *Intensive Care Medicine*, pages 1–14, 2020.

- 180 [2] Matteo Chinazzi, Jessica T. Davis, Marco Ajelli, Corrado Gioannini,  
181 Maria Litvinova, Stefano Merler, Ana Pastore y Piontti, Kunpeng Mu,  
182 Luca Rossi, Kaiyuan Sun, Cécile Viboud, Xinyue Xiong, Hongjie Yu,  
183 M. Elizabeth Halloran, Ira M. Longini, and Alessandro Vespignani. The  
184 effect of travel restrictions on the spread of the 2019 novel coronavirus  
185 (covid-19) outbreak. *Science*, 2020.
- 186 [3] Michael Day. Covid-19: Italy confirms 11 deaths as cases spread from  
187 north, 2020.
- 188 [4] Giuseppe Gaeta. Data analysis for the covid-19 early dynamics in north-  
189 ern italy, 2020.
- 190 [5] Weijie Guan, Zheng-yi Ni, Yu Hu, Wenhua Liang, Chun-quan Ou, Jian-  
191 xing He, Lei Liu, Hong Shan, Chun-liang Lei, David SC Hui, et al. Clin-  
192 ical characteristics of coronavirus disease 2019 in china. *New England*  
193 *Journal of Medicine*, 2020.
- 194 [6] Chaolin Huang, Yeming Wang, Xingwang Li, Lili Ren, Jianping Zhao,  
195 Yi Hu, Li Zhang, Guohui Fan, Jiuyang Xu, Xiaoying Gu, et al. Clini-  
196 cal features of patients infected with 2019 novel coronavirus in wuhan,  
197 china. *The Lancet*, 395(10223):497–506, 2020.
- 198 [7] Matt J Keeling and Pejman Rohani. *Modeling infectious diseases in*  
199 *humans and animals*. Princeton University Press, 2011.

- 200 [8] Mei Fong Liew, Wen Ting Siow, Graeme MacLaren, and Kay Choong  
201 See. Preparing for covid-19: early experience from an intensive care unit  
202 in singapore. *Critical Care*, 24(1):1–3, 2020.
- 203 [9] Roujian Lu, Xiang Zhao, Juan Li, Peihua Niu, Bo Yang, Honglong Wu,  
204 Wenling Wang, Hao Song, Baoying Huang, Na Zhu, et al. Genomic char-  
205 acterisation and epidemiology of 2019 novel coronavirus: implications  
206 for virus origins and receptor binding. *The Lancet*, 395(10224):565–574,  
207 2020.
- 208 [10] Monica Malta, Anne W Rimoin, and Steffanie A Strathdee. The coron-  
209 avirus 2019-ncov epidemic: Is hindsight 20/20? *EClinicalMedicine*, 20,  
210 2020.
- 211 [11] Andrea Remuzzi and Giuseppe Remuzzi. COVID-19 and italy: what  
212 next? *The Lancet*, 2020. Publisher: Elsevier.
- 213 [12] Fariba Rezaeetalab, Mahnaz Mozdourian, Mahnaz Amini, Zahra Javi-  
214 darabshahi, and Farzaneh Akbari. Covid-19: A new virus as a poten-  
215 tial rapidly spreading in the worldwide. *Journal of Cardio-Thoracic*  
216 *Medicine*, 8(1):563–564, 2020.
- 217 [13] Joseph T Wu, Kathy Leung, and Gabriel M Leung. Nowcasting and  
218 forecasting the potential domestic and international spread of the 2019-  
219 ncov outbreak originating in wuhan, china: a modelling study. *The*  
220 *Lancet*, 395(10225):689–697, 2020.

- 221 [14] Reza Yaesoubi and Ted Cohen. Generalized markov models of infectious  
222 disease spread: A novel framework for developing dynamic health poli-  
223 cies. *European Journal of Operational Research*, 215(3):679–687, 2011.
